# Supplementary material
Source: publisher figshare collection journal article supplement (https://tandf.figshare.com/articles/dataset/_/5405671)
Supplement: Supplementary file 1 [file 2]

Archive with 2 entries (2 files):
- taje_a_1365586_sm8484.xlsx
- taje_a_1365586_sm8483.pdf
