# Supplementary material
Source: publisher figshare collection journal article supplement (https://tandf.figshare.com/articles/dataset/_/5405671)
Supplement: Supplementary file 1 [file 2 › taje_a_1365586_sm8484.xlsx]

## Sheet: Table A1.1
Mory, Crowley, Backhouse, Nicholl, Bryan, Lopez Martinez & Mantle (2017). Australian Journal of Earth Sciences, 64(7), doi:10.1080/08120099.2017.1365586
Table A1. Summary range chart and palynozonation for Pittston SD-1
Depth (m)	491.05	492.5	620.75	622	623	623.05	624.1	624.4 tuff	625.2	626.95	627.4	628.9	633.95	634.2	634.65 tuff	634.8	636	636.05 tuff	640.1	640.9	643.5–687 basalt	690.8	691.1	694–714 basalt	715.5	740.3	746.8	752.5	759.45
Spores-pollen	D. parvithola APP5004 or above			M. villosa APP331–332														?	?upper P. sinuosus APP322					?	?P. sinuosus ?APP321				?M. trisina – P. sinuosus ?AAP222– 3102
Acanthotriletes superbus	1				3	3		4	3	1		1	1	2		2	2								1
Alete spores										X				1			3		X				X			X
Alisporites spp.	12	13	16	8	10	13	24		9	16	3	6	9	11		11	21		47	57		41	38		42	19	11	8	11
Altitriletes densus	1	1	X							X		1	X				1					X	1			?		?
Baculatisporites spp.	2	3	3	X	2	X	2		1	1	X	1	1	X			X		1	2		X	X		1	X
Barakarites rotatus																			X			1	X			X		X	1
Bascanisporites undosus	X	X	2
Brevitriletes cornutus			X				X			X			1			X	2		X	1		1					X	1	X
Brevitriletes levis																			2							X
Brevitriletes parmatus																									X		1	X
Caheniasporites elephas																											1		X
Columnisporites sp. cf. C. peppersii																									X
Converrucosisporites pustulatus																										1	1		X
Corisaccites alutas																													X
Cycadopites cymbatus																										1	1	X	1
Cyclogranisporites gondwanensis	2	3	2	1	1	13	7		2	21	1	5	46	44		29	14		1				1			X			X
Densosporites rotundidentatus																						1	X		1	2	1		2
Densosporites spp.			X							X			X												X	2		2	2
Diatomozonotriletes townrowii																										X
Dictyotriletes aules							X
Didecitriletes ericianus	3	3	3
Dulhuntyispora dulhuntyi	X		X
Dulhuntyispora omasi	X		X
Dulhuntyispora parvithola	X	2	1
Dulhuntyispora stellata	X	1	X
Ephedripites sp. A of Foster			X
Florinites eremus			X	1			X																			X	X		X
Gondisporites bharadwajii			X
Gondisporites ewingtonensis																						1			1		1		X
Gondisporites raniganjensis	1	2	5		2	X	3		2	2		7	1				4		X				X		X		1	1	1
Gondisporites wilsonii							X			X																X	X	1	1
Horriditriletes ramosus		X			4	3	1		4	5		X	3	1		5	2					2			X			1	2
Horriditriletes tereteangulatus	8	9	7	18	16	20	11		11	29	25	9	22	22		29	12		2	2		6	3		4	2	7	6	11
Indospora clara	2	2	3	2	33	30	12		42	4	15	3	1	2		2	X		1			X			X
Indotriradites niger/splendens	1	2	X			X	2		1	1		2	X				X		X	1		2	X		X	9	4	6	3
Indotriradites splendens (indented)																										X	2	3	X
Indotriradites splendens (verrucate)	X		X				1				X														X	1	1	1	X
Interradispora daedala			X		X						1		X						X
Interradispora robusta																									X	X		X
Jayantisporites pseudozonatus																											1		X
Jayantisporites sp. A of Backhouse																	1		3	6		1	1		2		1
Jayantisporites variabilis				1			X			X												1	X		X	2	2	3	1
Klausipollenites sp. A of Foster	X	1			X		X		1	X													X
Laevigatosporites colliensis	2	X	1	X	X	1	1		1	X	X	X	X	X		1	1		X			X	1		X	2	X	X	2
Leiotriletes directus	12	15	10	4	10	5	8		3	1	9	5	6	5		7	15		2	4		8	10		13	11	18	15	10
Leiotriletes virkii					X		1			X		4	X			1	X		1						X	1	X	1	1
Limitisporites rectus	1	1	1				2						X									X	X		1	X	1	X	2
Lophotriletes novicus	3	1	1	54	3	5			2	3			2	5		7	3		X				1		1
Marsupipollenites striatus	3	X	2		2		1		X	X									X			X	X		1	1	1	X	2
Marsupipollenites triradiatus	7	5	8		1	X	X		1	1		1	X				X		X	1		2	4		2	2	2	4	3
Microbaculispora "baculatus" of Price																							X
Microbaculispora micronodosa	2	1		1			1			X	1	X	X			X			1	1		3	1		8	3	4	7	5
Microbaculispora spp.	X	2			X				X	X							3		2							X
Microbaculispora tentula			1	1			1				2	1								X		3			2	11	4	4	8
Microbaculispora trisina	1	2	4		X		X		X	X	1	1	X			2	X		X			X	1		1	3	3	4	2
Microbaculispora villosa	1				X	X	1			1		X	X				X
Microfoveolatispora explicata					1				X			44	X				X
Microreticulatisporites bitriangularis		1
Phaselisporites cicatricosus		X
Plicatipollenites spp.	1	X	X			2	1			X			X				1		X			1	1		1	3	2	4	4
Potoniesporites balmei							X						X						X				1			X	2	X
Potonieisporites novicus																												X
Praecolpatites sinuosus	1	X	X		X	1	1		X	1	1		X				X		X				2				?	?
Procoronaspora spinosa										1												3			1	1	X	1	X
Protohaploxypinus amplus	7	6	4	1	2	X	3		1	3	1		1	X			X		2	2		7	13		2	2	3	1	3
Protohaploxypinus limpidus	7	3	10	3	2		4		2	X		X	1	3		2	5		24	14		5	3		5	3		X	3
Protohaploxypinus pennatulus		X			1		1		1	4							2		X				4
Protohaploxypinus rugatus	1	1	1		X	X			1	X						1
Pseudoreticulatispora confluens																									2				X
Pseudoreticulatispora pseudoreticulata							X															X	X		1	3	2	5	3
Pteruchipollenites gracilis																										X
Punctatisporites gretensis	1	1					X			X	1														1	1	1	1	X
Retusotriletes nigritellus	1	1	2	1			X					X					1		X			1	X		1	1	1	1	2
Scheuringipollenites maximus	2	7	2		X	X	3		2	3	4		2	1			2		6	1		4	7		2	2	4
Scheuringipollenites ovatus	3	4	4	2	X	X	2		1	1			1	1		1			X	5		1	1		X		2	1	2
Schizopollis disaccoides			1
Secarisporites lacunatus																						X			X			1
Striatoabieitites multistriatus	1		X	1	X		1		1	X			X				X					1	X		X	X	2	2	1
Striatopodocarpites cancellatus	2		1	X	1				2	X			X	1		X			X			1	X		X
Striatopodocarpites fusus	2	3	4		1	1	2		1	X		X	X				5		1	X		1	3		X	4	3	5	3
Thymospora spp.		X			1	3	1		1	X	25								1
Tiwariasporites simplex				1	1				1	X							X					1			X	X	2	1	1
Verrucosisporites naumoviae									X																	1	2	2	2
Verrucosisporites trisecatus	1
Vittatina fasciolata		1																		1		1			X	1	1	1
Vittatina scutata			X
Weylandites lucifer		2
Weylandites magmus	1																						X			X	1	X	X
Algae & acritarchs
Botryococcus spp.	1		1				1			1	4								X	1			2		2	2	1	2	3
Brazilea scissa				X			X					6	2						2				1		X
Circulisporites spp.					2	X			X	X	X											X
Cymatiosphaera gondwanensis			X				X										X		X				X
Deusilites sp.																			1	1			X
Maculatasporites minimus			X							X																X	1	2	X
Maculatasporites sp. A of Backhouse	1				X																	X				X		X	1
Mehlisphaeridium fibratum																									1	1	X	X
Mehlisphaeridium regulare			X			X			?													X			X		X	X	X
Micrhystridium spp.									?														X		X	X	1	1
Peltacystia venosa	1		X		1	X	1		1	X	6	3	X	1		X	X		X	X		X						1	1
Pyramidosporites cyathodes	1					X	X			X
Rugaletes playfordii	X	1
Tetraporina gigantea	X																									1	X		X
Tetraporina tetragona									2																X	1		X	X
X = present Counts	100	100	100	100	100	100	100		100	100	100	100	100	100		100	100		100	100		100	100		100	100	100	100	100
No. slides examined	1	2	1	2+	2+	2	4		2	2	2	1+	1.5	1		1	2		1	2+		2+	2		2+	1	3	1	2
+ indicates kerogen slides also used

## Sheet: Table A1.2
Mory, Crowley, Backhouse, Nicholl, Bryan, Lopez Martinez & Mantle (2017). Australian Journal of Earth Sciences, 64(7), doi:10.1080/08120099.2017.1365586
Table A1.2 Summary range chart and palynozonation for Rey Resources drill holes
Borehole	P5A-25C	P5A-25C	P5A-25C	P5A-25C	P5A-25C	P5A-25C	P5A-25C		P3A-21C	P3A-21C	P3A-21C	P3A-21C	P3A-21C	P3A-21C	P3A-21C		D15A-16C	D15A-16C	D15A-16C	D15A-16C	D15A-16C	D15A-16C	D15A-16C
Depth (m)	58.7	62.4	69.8	76	80.35 tuff	81	84.95		64.9	70.46 tuff*	70.7	72.05	72.5	82.9	85.1		60	68.7	77.9	90.35	91.9	94.7 tuff	101.6
Spores-pollen	D. ericianus APP442		D. granulata APP441						D. granulata APP441								D. ericianus APP442		D. granulata APP441				indet
Alisporites spp./Scheuringipollenites spp.	38	50	36	42		14	22		39		44	51	39	50	57		49	36	46	16	45
Altitriletes densus	1	X	5	2					4		3	1	3	2	1		1	3	4	1	2				HOLE	EAST	NORTH	AHD (m)
Baculatisporites spp.			1			9			1		1		1	X			2		1		1				P5A-25C	670096	7999248	85.5
Balmeospora gliksoniae													1		1		X	X	X						P3A-21C	669108	7997153	82.4
Balmeospora lordii				X											1			X							D15A-16C	666156	7992715	70.4
Barakarites rotatus															1			1
Bascanisporites undosus												1					X				1					GDA94	Zone 51S
Columnisporites heyleri	X	1
Cycadopites cymbatus									?
Densoisporites holospongia				X
Densoisporites rotundidentatus	X			1									1	X
Didecitriletes ericianus	X	X				?											X	X
Dulhuntyispora dulhuntyi	1	1	X						1				3		1		X	X	1		1
Dulhuntyispora granulata		?	X						X		1	1	X	2	X		X		X
Dulhuntyispora inornata												1	X
Florinites eremus																			X
Gondisporites raniganjensis	2	2	1	2							2	1			1		1	2	1		2
Gondisporites wilsonii			X												1		X	X	X	1
Horriditriletes ramosus									2					2
Horriditriletes tereteangulatus	3	1	2	4		11	1		4		4	2	2	2	1		2	4	5	1	3
Indospora clara						9			1					X	1			X			1
Indotriradites niger/splendens	18	9	11	4			20		6		4	7	10	2	8		9	6	11		10
Indotriradites splendens (verrucate)	2		2	X					1		1	2	1					1	1
Interradispora robusta														1			X
Interradispora versus																	1
Jayantisporites sp. A of Backhouse																	X
Jayantisporites sp. B Backhouse 1991																		1
Jayantisporites variabilis	1	X		2			1		1		2	1	2	2			1	X	1		2
Laevigatosporites colliensis				1		1			1					X				X	X		1
Leiotriletes directus	1	3	3	6			5		8		7	4	7	4	X		5	9	2	2	1
Leiotriletes virkii									1		1	1		X			1	X			1
Limitisporites rectus	2								2		3		1	2				1	2		1
Lundbladispora sp. A Foster							1
Marsupipollenites striatus		X							1					X
Marsupipollenites triradiatus	6	1	1	3			3		2		1	3	1	6	3		2	7	4		1
Microbaculispora micronodosa	2	2	2	4			2		4		2		4	5	1		1	5	2		5
Microbaculispora tentula	2		3						3		4	3	1	1	1			3			1
Microbaculispora trisina	5	10	6	3			11		5		5	3	5	1	6		4	3	7	2	4
Microbaculispora villosa	1	4	2	3			2		1		1	1	2	1	2		3	1	X		2
Microbaculispora spp.				1			1											X
Phaselisporites cicatricosus		2	2						1		X			X			X		X
Plicatipollenites spp.	2	4	3	2			8		2		5	2	4	1	1		4	6	2
Polypodiisporites spp.						16															4
Potoniesporites balmei		1	1				1					X		1			X	X			1
Potonieisporites novicus											X				X
Praecolpatites ovatus															X
Praecolpatites sinuosus	1	3	2	X		?	1		2		1	2	3	2	1		X	1	2		3
Procoronaspora spinosa				X
Propinquispora praetholus							1
Protohaploxypinus amplus	1	2	2	3			2		2		2	4	2	4	2		4	5	1	1
Protohaploxypinus limpidus			1	2			2		1					2	1		1	X	3
Pseudoreticulatispora pseudoreticulata			X						X		1	X	1	X	X		X	X			X
Punctatisporites gretensis	2		3	3			6		X		1	1		2	1		1	1			1
Retusotriletes nigritellus									X			X	1	1				X			1
Secarisporites lacunatus									?
Striatoabieitites multistriatus	2		1	2			1		1			1	1	1			2		X
Striatopodocarpites fusus	2	1	6	2			2		2		1	4	2	1	5		3	2	1		3
Striatopodocarpites cancellatus									1				1	X
Tiwariasporites simplex	X		X	1									X
Verrucosisporites naumoviae	1	1		1			2											X
Verrucosisporites trisecatus																		X	X
Verrucosisporites spp.		X	X
Vittatina fasciolata														1				X			X
Vittatina scutata														X
Algae & acritarchs
Botryococcus spp.	4	1	3	3			4				2	2	1	1	2		2	1	3		2		A
Circulisporites spp.													X
Cymatiosphaera gondwanensis			1								X
Maculatasporites amplus	X
Maculatasporites minimus													X	X
Mehlisphaeridium regulare		1		1			1				1							1	X
Micrhystridium spp.				2														X
Peltacystia venosa																	1
Pyramidosporites cyathodes												1
Tetraporina tetragona												X
Tetraporina gigantea																		X
counts	100	100	100	100		60	100		100		100	100	100	100	100		100	100	100	24	100
X = present
A = abundant
* tuff not processed
Note: incomplete counts are due to low yields

## Sheet: Table A3.1
Mory, Crowley, Backhouse, Nicholl, Bryan, Lopez Martinez & Mantle (2017). Australian Journal of Earth Sciences, 64(7), doi:10.1080/08120099.2017.1365586
Table A3.1. LA-ICPMS zircon isotopic U-Pb and trace element concentration data for Pittston SD-1
								Corrected isotope ratios															Dates (Ma)											207-corrected		208-corrected			Concentrations (ppm)
Analysis		U	Th	Pb*		206Pb		208Pb*	±2s	206Pb*	±2s	207Pb*	±2s	206Pb*	±2s	error	238U	±2s	207Pb*	±2s	error		208Pb*	±2s	207Pb*	±2s	207Pb*	±2s	206Pb*	±2s		%		206Pb*	±2s	206Pb*	±2s		P	Ti	Y		Nb	La	Ce	Pr	Nd	Sm	Eu
	Notes	ppm	ppm	ppm	Th/U	204Pb		232Th	(%)	207Pb*	(%)	235U*	(%)	238U	(%)	corr.	206Pb*	(%)	206Pb*	(%)	corr.		232Th	(Ma)	206Pb*	(Ma)	235U	(Ma)	238U*	(Ma)		disc.		238U*	(Ma)	238U*	(Ma)					Zr
208754 L 7 10/10/2014 11:56:35 AM (Run: 1)		34.6879	51.3069	10.3873	1.4791	213.786		0.0605049	8.36189	12.8216	9.5799	2.12171	10.4956	0.1973	4.28748	0.402981	5.06843	4.28748	0.0779935	9.5799	3.41542e-16		1187.36	96.4261	1146.72	190.326	1155.89	72.4318	1160.8	45.5454		-1.2276		36.438	0.920222	0.001	0.460892		312.66	17.8697	634.778	751490	1.91157		36.2924	0.0260263	0.771052	1.62465	0.493358
208754 L 5 10/10/2014 11:53:13 AM (Run: 1)		76.8287	73.6993	9.29045	0.959267	665.019		0.0266716	8.93142	17.2916	9.07009	0.728067	11.5907	0.0913071	7.21653	0.619637	10.9521	7.21653	0.0578316	9.07009	-2.14304e-16		532.027	46.8977	523.391	198.935	555.418	49.5851	563.263	38.9228		-7.61786		37.5908	0.871666	0.001	0.474584		354.578	12.1549	765.42	777483	1.03982		27.1445	0.0406224	1.35897	2.84882	0.670452
208754 M 13 10/10/2014 12:13:44 PM (Run: 1)	high U signal variance	136.79	203.546	10.9673	1.48802	843.246		0.017192	7.85225	21.0027	9.08831	0.34654	10.1417	0.0527871	4.50079	0.43838	18.944	4.50079	0.0476129	9.08831	0		344.534	26.8244	80.032	215.791	302.116	26.5018	331.61	14.5477		-314.347		38.0316	0.855414	0.001	0.479241		265.46	8.94092	1192.2	739088	0.947078	0.012038	24.0933	0.491674	5.77257	6.48155	2.33332
208754 M 41 10/10/2014 1:21:53 PM (Run: 1)	high U signal variance	74.4365	60.4011	4.22646	0.811445	438.129		0.0130249	13.7911	19.4369	14.3818	0.316397	15.6143	0.0446023	6.08031	0.386843	22.4204	6.08031	0.0514486	14.3818	-1.60131e-16		261.561	35.8396	261.001	330.301	279.127	38.1065	281.297	16.736		-7.77656		38.1279	0.852078	0.001	0.480218		391.291	15.2391	1401.51	756968	4.49966	1.04064	9.19349	0.504823	8.11777	10.2798	1.57971
208754 M 17 10/10/2014 12:20:28 PM (Run: 1)	high 206Pb/238U variance	83.9066	63.0192	4.65719	0.751064	154.831		0.0127793	11.1089	19.5003	12.197	0.313285	13.3605	0.0443076	5.45327	0.404781	22.5695	5.45327	0.0512813	12.197	0		256.66	28.3319	253.467	280.51	276.724	32.3619	279.479	14.9151		-10.2624		38.1312	0.851964	0.001	0.480251		197.252	10.1901	1684	768662	2.92568	0.068991	4.09311	0.258329	5.69023	10.9543	2.34959
208754 M 11 10/10/2014 12:10:22 PM (Run: 1)	high U signal variance	67.459	42.6684	3.68196	0.632509	55.1017		0.0143997	16.3082	19.9078	12.2189	0.304333	13.4737	0.0439411	5.67798	0.41818	22.7578	5.67798	0.0502316	12.2189	4.03664e-16		288.973	46.791	205.734	283.455	269.779	31.9211	277.215	15.4066		-34.7447		38.1356	0.851814	0.001	0.480295		197.944	9.08917	1281.43	748054	4.69483		6.16133	0.244932	3.49859	7.69469	1.26591
208754 M 32 10/10/2014 12:59:43 PM (Run: 1)	high U signal variance	63.3795	35.1067	3.26751	0.553913	141.688		0.0116489	17.5742	22.9103	14.0804	0.264001	14.7711	0.0438667	4.46398	0.29851	22.7963	4.46398	0.0436486	14.0804	0		234.089	40.902	-130.508	348.031	237.886	31.3257	276.756	12.0929		312.061		38.1366	0.851781	0.001	0.480305		214.143	7.49274	1279.54	757356	5.63515	0.0234779	7.86883	0.121286	4.98275	8.42305	2.00767
208754 M 24 10/10/2014 12:39:15 PM (Run: 1)	z4	62.779	39.2645	3.55155	0.625439	251.553		0.0175142	12.154	17.6013	13.1669	0.343253	14.8088	0.0438185	6.77731	0.455213	22.8214	6.77731	0.0568141	13.1669	1.56877e-16		350.935	42.2844	484.292	290.737	299.634	38.4243	276.459	18.3404		42.9149		38.1372	0.851761	0.001	0.480311		263.695	16.6193	2094.28	780090	2.7126		4.95685	0.472557	7.64728	14.3837	4.53035
208754 L 3 10/10/2014 11:49:51 AM (Run: 1)		82.6892	48.3296	4.4307	0.584473	680.416		0.0144047	13.5973	20.7128	20.2242	0.29094	20.89	0.0437061	5.23201	0.248175	22.8801	5.23201	0.0482792	20.2242	-2.64776e-16		289.073	39.0264	112.961	477.253	259.299	47.8041	275.764	14.1238		-144.123		38.1381	0.851727	0.001	0.480321		210.737	9.31224	1830.02	763384	5.92766	0.040402	7.88918	0.220854	5.43194	12.6286	2.65996
208754 M 23 10/10/2014 12:37:34 PM (Run: 1)	z5	106.394	66.47	5.68011	0.624754	244.6		0.0129691	11.7714	19.5224	8.79986	0.308545	9.87925	0.0436868	4.49022	0.448984	22.8902	4.49022	0.0512233	8.79986	0		260.449	30.4619	250.89	202.473	273.053	23.6529	275.645	12.1162		-9.86672		38.1382	0.851725	0.001	0.480321		248.974	6.09641	1934.81	722002	10.1402	0.0375253	12.0256	0.495406	7.46948	14.8511	3.07955
208754 M 39 10/10/2014 1:11:31 PM (Run: 1)		118.568	123.72	7.43841	1.04345	188.566		0.0165294	17.7165	17.2622	21.9118	0.348223	23.1506	0.0435966	7.47142	0.321323	22.9376	7.47142	0.05793	21.9118	-6.84877e-16		331.363	58.2273	527.092	480.297	303.384	60.7138	275.088	20.1206		47.8103		38.1392	0.851693	0.001	0.480331
208754 M 46 10/10/2014 1:30:16 PM (Run: 1)	high U signal variance	94.9448	74.2972	5.22053	0.782531	100.279		0.012844	14.6228	21.731	19.4051	0.276476	19.8538	0.0435749	4.19728	0.208492	22.949	4.19728	0.0460171	19.4051	0		257.952	37.4802	-1.52451	467.89	247.858	43.6635	274.954	11.2979		18135.5		38.1396	0.851677	0.001	0.480336		667.026	3.54235	11635.5	705960	25.2679		51.2306	0.361019	8.87728	27.1942	9.54081
208754 M 44 10/10/2014 1:26:55 PM (Run: 1)		50.5679	28.2894	2.70104	0.559433	214.297		0.0152933	20.4819	19.8793	17.2063	0.30076	18.365	0.0433631	6.42001	0.347516	23.0611	6.42001	0.0503036	17.2063	-5.06834e-16		306.771	62.3579	209.061	398.91	266.994	43.1165	273.646	17.2004		-30.8924		38.1426	0.851577	0.001	0.480365		697.886	6.44833	1078.65	731824	3.95056	8.01592	25.7466	3.19286	18.3881	7.95228	1.31148
208754 L 1 10/10/2014 11:46:30 AM (Run: 1)		61.9019	52.1802	3.42213	0.842951	704.22		0.0127541	12.8527	22.1584	14.9885	0.269089	16.5762	0.0432448	7.07906	0.424935	23.1241	7.07906	0.0451295	14.9885	0		256.158	32.7154	-48.6693	364.663	241.965	35.6877	272.915	18.9165		660.753		38.1438	0.851536	0.001	0.480377		321.45	11.791	2400.98	742127	2.64773		4.95528	0.362955	5.8177	16.2503	5.11137
208754 M 29 10/10/2014 12:47:41 PM (Run: 1)	high U signal variance	66.7885	35.7921	3.31446	0.535903	143.66		0.00978895	24.3804	21.142	18.9859	0.280518	20.5317	0.0430136	7.81576	0.379144	23.2485	7.81576	0.0472992	18.9859	1.88695e-16		196.894	47.7703	64.3522	452.117	251.068	45.6699	271.486	20.7781		-321.875		38.1465	0.851442	0.001	0.480405		350.564	9.5562	1047.4	791512	6.87744	3.04871	14.4209	1.22283	7.71676	8.44457	1.405
208754 M 47 10/10/2014 1:31:58 PM (Run: 1)	high U signal variance	111.076	74.1037	5.86787	0.667144	387.438		0.0123231	10.4516	18.0708	9.68531	0.327087	10.7028	0.0428685	4.55458	0.420565	23.3271	4.55458	0.055338	9.68531	0		247.553	25.7155	425.904	216.029	287.339	26.7849	270.589	12.0691		36.4671		38.1478	0.851398	0.001	0.480418		423.858	6.95827	2167.42	726178	10.5251	1.67011	22.4317	1.25456	10.8149	17.4363	4.81906
208754 M 33 10/10/2014 1:01:24 PM (Run: 1)		63.3089	50.6624	3.44734	0.800241	74.9129		0.0133878	17.1331	22.1051	10.8375	0.264953	12.3723	0.0424778	5.96845	0.4791	23.5417	5.96845	0.0452383	10.8375	0		268.801	45.7491	-42.8218	263.376	238.651	26.3133	268.173	15.6774		726.254		38.1528	0.851228	0.001	0.480468		231.014	11.471	2324.04	812679	3.29157	0.0602811	5.10481	0.238748	4.36177	10.7784	2.17515
208754 M 28 10/10/2014 12:46:00 PM (Run: 1)	z3	56.7478	42.8063	2.99788	0.754325	57.6154		0.0123237	14.284	23.9486	23.4794	0.244238	24.1919	0.0424221	5.82789	0.239167	23.5726	5.82789	0.041756	23.4794	4.09196e-16		247.565	35.1464	-241.236	593.116	221.885	48.218	267.829	15.289		211.024		38.1535	0.851204	0.001	0.480475		254.852	11.6226	1554.3	790347	1.38344	0.25917	3.76033	0.456855	6.16263	11.7957	2.23854
208754 M 18 10/10/2014 12:22:09 PM (Run: 1)	high U signal variance	242.23	229.307	13.8074	0.946649	490.569		0.0136587	6.06486	18.7167	6.34079	0.311838	7.80605	0.0423308	4.5529	0.576323	23.6235	4.5529	0.0534283	6.34079	0		274.204	16.5178	347.016	143.405	275.604	18.8413	267.264	11.9195		22.9823		38.1529	0.851224	0.001	0.480469		323.88	11.9396	3896.3	717650	9.60046	1.44649	15.0551	0.990259	14.3131	26.4656	3.9738
208754 M 38 10/10/2014 1:09:49 PM (Run: 1)		74.7044	48.2007	3.85093	0.645219	153.748		0.012813	13.1977	24.89	12.7358	0.233923	15.5212	0.0422277	8.87176	0.569819	23.6811	8.87176	0.0401767	12.7358	1.23932e-16		257.333	33.7467	-339.636	328.128	213.432	29.8773	266.627	23.172		178.504		38.1556	0.851133	0.001	0.480496		280.165	7.03549	1110.27	760799	5.42268	0.181171	7.06527	0.102773	2.32508	3.68681	1.10595
208754 M 31 10/10/2014 12:58:02 PM (Run: 1)		125.248	127.397	7.04902	1.01717	339.916		0.0125245	9.66676	21.3152	7.81947	0.272817	9.37264	0.0421755	5.16744	0.546292	23.7104	5.16744	0.0469148	7.81947	-1.73407e-16		251.574	24.1684	44.9015	186.888	244.944	20.3985	266.304	13.4807		-493.085		38.1558	0.851125	0.001	0.480498		574.308	5.20115	10551.9	772293	16.5036	0.0485229	28.9311	0.360335	8.12506	19.2801	5.12406
208754 M 45 10/10/2014 1:28:36 PM (Run: 1)		113.172	101.055	6.2441	0.892934	121.551		0.0133072	9.36473	21.4101	11.6103	0.270123	13.1034	0.0419449	6.0746	0.460534	23.8408	6.0746	0.0467068	11.6103	1.9868e-16		267.193	24.8573	34.2212	278.056	242.792	28.2964	264.877	15.7642		-674.015		38.1586	0.851032	0.001	0.480526		671.538	4.12912	8819.35	729252	32.0775	0.297053	52.1296	0.55033	7.61768	15.3218	5.90824
208754 M 25 10/10/2014 12:40:56 PM (Run: 1)	reverse fractionation	47.8324	30.4638	2.50117	0.636887	369.149		0.0138312	19.8766	18.4371	14.6585	0.313189	15.7858	0.0418792	5.85828	0.368462	23.8782	5.85828	0.0542384	14.6585	1.62977e-16		277.642	54.8086	380.952	329.54	276.65	38.2275	264.471	15.1799		30.5763		38.1599	0.850986	0.001	0.480539		267.386	15.1346	699.082	767755	2.72353	0.176783	3.61659	0.0361498	1.44049	2.73167	0.439776
208754 M 10 10/10/2014 12:01:41 PM (Run: 1)		184.96	117.179	9.49521	0.633537	1131.41		0.012246	6.66611	18.376	7.37274	0.314	9.21555	0.0418483	5.52894	0.59509	23.8958	5.52894	0.0544189	7.37274	-1.72147e-16		246.014	16.3002	388.405	165.532	277.276	22.3607	264.28	14.3164		31.9578		38.1589	0.85102	0.001	0.480529		349.42	10.5375	1588.66	692823	9.05558	0.320501	12.3663	0.393603	4.82557	7.56847	1.47807
208754 M 35 10/10/2014 1:04:46 PM (Run: 1)	z7	55.5915	26.5833	2.79102	0.478189	1464.61		0.0145365	17.7	19.8625	14.8404	0.29021	16.6486	0.0418065	7.54582	0.451299	23.9197	7.54582	0.0503462	14.8404	2.50008e-16		291.699	51.26	211.029	343.935	258.725	38.0242	264.021	19.5201		-25.111		38.1607	0.85096	0.001	0.480547		271.115	7.41514	930.271	777359	6.36278	0.562903	10.0546	0.718035	3.75648	5.23337	1.47269
208754 M 49 10/10/2014 1:35:19 PM (Run: 1)		65.7332	35.338	3.28896	0.537597	335.563		0.0129014	19.6595	19.18	13.9077	0.298925	15.6103	0.0415823	7.08932	0.451947	24.0487	7.08932	0.0521377	13.9077	1.41987e-16		259.097	50.6119	291.429	317.675	265.56	36.4771	262.633	18.2447		9.88094		38.1633	0.850873	0.001	0.480573		246.522	7.86145	947.21	717470	5.77942		5.64364	0.0508719	1.04685	2.80417	0.982948
208754 M 36 10/10/2014 1:06:27 PM (Run: 1)	high U signal variance	61.8962	31.9202	2.94826	0.515705	216.096		0.0103209	17.1405	27.3346	31.6104	0.208988	32.0742	0.0414318	5.43444	0.168035	24.136	5.43444	0.0365837	31.6104	6.5197e-16		207.538	35.3909	-587.08	856.987	192.703	56.297	261.702	13.9372		144.577		38.165	0.850814	0.001	0.48059		271.115	12.0573	1050.27	755218	6.24669		6.3758	0.138927	1.34911	4.99069	1.21154
208754 M 21 10/10/2014 12:34:12 PM (Run: 1)		138.07	151.087	7.81367	1.09428	179.384		0.0127873	9.50677	22.1372	10.0496	0.257336	12.5886	0.0413162	7.58139	0.599672	24.2036	7.58139	0.0451729	10.0496	0		256.821	24.2609	-46.3575	244.397	232.518	26.1611	260.986	19.3912		662.987		38.1657	0.85079	0.001	0.480597		555.626	6.95097	5518.39	788205	17.6673		30.1503	0.139874	4.39586	12.7529	3.63722
208754 M 27 10/10/2014 12:44:18 PM (Run: 1)	z2	88.4703	65.1065	4.67581	0.735913	449.069		0.0136059	15.7807	17.4246	12.0041	0.325325	13.2049	0.0411129	5.502	0.413294	24.3232	5.502	0.0573901	12.0041	0		273.151	42.8152	506.55	264.046	285.99	32.9124	259.728	14.0062		48.7261		38.1686	0.850692	0.001	0.480626		247.135	10.7579	1924.7	785588	4.97784		7.72398	0.400788	6.33265	11.4811	2.09261
208754 M 50 10/10/2014 1:37:00 PM (Run: 1)	z1	129.527	96.6412	6.96491	0.746108	231.782		0.0141276	9.71714	14.9954	11.6728	0.377833	13.0561	0.0410918	5.84867	0.444781	24.3357	5.84867	0.0666873	11.6728	-2.053e-16		283.551	27.3606	828.029	243.488	325.442	36.3536	259.597	14.8813		68.6488		38.1684	0.850698	0.001	0.480624		471.514	31.1906	2838.25	744650	8.1873	1.86871	13.6809	1.05022	9.67355	11.3663	3.49625
208754 M 42 10/10/2014 1:23:33 PM (Run: 1)	high U signal variance	54.6615	25.8466	2.63964	0.472849	67.7821		0.0129804	19.9675	23.1548	16.7856	0.244281	17.7115	0.0410233	5.65169	0.316667	24.3764	5.65169	0.0431876	16.7856	5.90202e-16		260.674	51.7159	-156.819	417.031	221.92	35.3067	259.173	14.3571		265.269		38.1699	0.85065	0.001	0.480638		254.823	10.9439	823.106	741206	6.07899		6.79457	0.0538724	1.63481	3.36291	1.14554
208754 L 4 10/10/2014 11:51:32 AM (Run: 1)	high U signal variance	59.0064	28.5309	2.89315	0.483523	446.65		0.0138126	17.6735	20.4612	11.6665	0.276201	12.4604	0.0409878	4.37665	0.346678	24.3975	4.37665	0.0488731	11.6665	-5.48365e-16		277.272	48.6692	141.716	273.845	247.639	27.3822	258.953	11.1088		-82.7266		38.1702	0.850638	0.001	0.480642		234.132	10.5927	952.095	770540	7.03239	0.0723819	6.40911	0.0938518	1.81993	3.42383	1.09323
208754 M 26 10/10/2014 12:42:37 PM (Run: 1)	z6	72.2634	43.6394	3.60385	0.603894	210.314		0.0126033	18.3871	17.384	15.8241	0.321705	17.3253	0.0405608	7.05445	0.405173	24.6544	7.05445	0.0575241	15.8241	-2.50843e-16		253.148	46.2563	511.709	347.76	283.213	42.8187	256.308	17.7264		49.9114		38.1752	0.85047	0.001	0.480691		350.802	11.2838	1798.37	762067	5.40738	1.83012	11.3677	0.943059	10.0175	12.9416	3.11208
208754 M 12 10/10/2014 12:12:03 PM (Run: 1)		60.7191	30.9955	2.98416	0.510473	140.642		0.0144108	12.1118	19.7956	20.6835	0.28126	22.1577	0.0403808	7.94717	0.35726	24.7643	7.94717	0.0505163	20.6835	0		289.195	34.7774	218.782	478.689	251.656	49.3885	255.193	19.8844		-16.6423		38.1773	0.850398	0.001	0.480713		170.095	8.40153	1435.76	723185	3.54794		5.36515	0.157793	3.9925	9.40521	2.18225
208754 M 8 10/10/2014 11:58:19 AM (Run: 1)		154.125	100.187	7.62894	0.650033	969.824		0.0125144	10.6742	18.6243	12.4087	0.294491	13.4899	0.0397787	5.29161	0.388787	25.1391	5.29161	0.0536933	12.4087	0		251.374	26.6659	358.21	280.081	262.088	31.1609	251.461	13.0501		29.8007		38.1835	0.850188	0.001	0.480775		260.045	9.34088	2755.83	699511	9.80881	0.0191493	13.2085	0.553017	10.5854	18.3174	3.33292
208754 M 19 10/10/2014 12:23:49 PM (Run: 1)		58.0814	28.16	2.79643	0.484836	3833.22		0.0140315	16.8919	15.7114	12.5023	0.346318	15.6349	0.039463	9.38841	0.5988	25.3402	9.38841	0.0636479	12.5023	-2.385e-16		281.636	47.2438	729.975	264.934	301.948	40.8369	249.503	22.9769		65.8203		38.1881	0.850033	0.001	0.480821		233.362	7.79627	914.274	751551	6.1222		7.69521	0.139258	1.76813	3.75882	1.31353
																													267.321	6.58297		Weighted mean date (Ma) from analyses shown in bold. Error includes standard calibration uncertainty
Experiment on October 10, 2014
Isotope ratio and date errors include systematic calibration errors of 0.70% (207Pb/206Pb) and 2.30% (206Pb/238U) (2 sigma).
Trace element concentrations were deleted from analyses known to have intersected inclusions of other minerals based on P and Ti.
Backgrounds were monitored between sweeps 10 to 20. Sample counts were integrated from sweeps 28 to 54.
Ablation used a laser spot size of 25 microns and a laser firing repetition rate of 10 Hz.
Activity of TiO2 for Ti-in-Zircon temperature calculation is 0.8.
[truncated: 28 more columns]

## Sheet: Table A3.2
Mory, Crowley, Backhouse, Nicholl, Bryan, Lopez Martinez & Mantle (2017). Australian Journal of Earth Sciences, 64(7), doi:10.1080/08120099.2017.1365586
Table A3.2 U-Pb zircon isotopic data for Pittston SD-1
								Radiogenic Isotope Ratios									Isotopic Dates
	Th	206Pb*	mol %	Pb*	Pbc	206Pb		208Pb	207Pb		207Pb		206Pb		corr.		207Pb		207Pb		206Pb
Sample	U	x10-13 mol	206Pb*	Pbc	(pg)	204Pb		206Pb	206Pb	% err	235U	% err	238U	% err	coef.		206Pb	±	235U	±	238U	±
(a)	(b)	(c)	(c)	(c)	(c)	(d)		(e)	(e)	(f)	(e)	(f)	(e)	(f)			(g)	(f)	(g)	(f)	(g)	(f)
208754 (624.1–624.4 m)
z1	0.531471	0.206675	0.980815	15.5037	0.335511	940.434		0.168376	0.0516361	0.476013	0.302621	0.5263	0.0425054	0.0811167	0.667425		269.33	10.9146	268.445	1.24149	268.344	0.213204
z2	0.578482	0.169193	0.960227	7.41292	0.581619	453.632		0.183269	0.0518611	0.874772	0.303982	0.948041	0.0425114	0.103727	0.733766		279.29	20.022	269.506	2.24406	268.381	0.272669
z3	0.65603	0.271204	0.972654	11.1396	0.632819	659.769		0.207849	0.0518037	0.596011	0.302169	0.653035	0.0423047	0.0833728	0.718112		276.754	13.6479	268.093	1.53868	267.103	0.218141
z5	0.522862	0.0939808	0.954332	6.32318	0.37325	395.07		0.165651	0.0516941	1.12386	0.302752	1.21021	0.0424761	0.115838	0.766615		271.901	25.7572	268.547	2.85572	268.163	0.304261
z6	0.5225	0.115995	0.953484	6.20269	0.469647	387.873		0.165539	0.0518461	1.09708	0.303232	1.18168	0.0424187	0.117961	0.741383		278.628	25.1131	268.921	2.7918	267.808	0.309437
z7	0.516819	0.106712	0.959827	7.2159	0.370685	449.109		0.163736	0.0513404	0.918283	0.300688	0.993746	0.0424773	0.110422	0.712945		256.141	21.1056	266.938	2.33265	268.17	0.290045
z8	0.486937	0.146461	0.973184	10.8746	0.334938	672.82		0.154272	0.0513302	0.752095	0.300361	0.814986	0.0424394	0.0922099	0.712254		255.687	17.2874	266.682	1.91143	267.936	0.241999
z9	0.530557	0.145377	0.974135	11.4196	0.320354	697.556		0.168088	0.0517371	0.630472	0.303079	0.689656	0.0424866	0.0958712	0.660331		273.808	14.4446	268.802	1.62872	268.228	0.251877
z10	0.630373	0.184495	0.984481	19.7346	0.24137	1162.59		0.199708	0.0515567	0.426113	0.302117	0.47505	0.0425	0.0904598	0.608389		265.8	9.77671	268.052	1.11917	268.311	0.237732
z11	0.614203	0.145749	0.956753	6.85227	0.546777	417.187		0.194599	0.0512739	1.06835	0.299013	1.151	0.0422953	0.115536	0.739819		253.162	24.5682	265.629	2.69019	267.045	0.302229
z13	0.856867	0.115925	0.972551	11.6594	0.271542	657.297		0.271471	0.0515664	0.846014	0.300865	0.911675	0.042316	0.110596	0.633132		266.23	19.4096	267.076	2.14097	267.173	0.289444
z14	0.59925	0.0661443	0.937393	4.61935	0.36664	288.181		0.189852	0.0511654	1.62532	0.299445	1.74338	0.0424463	0.134896	0.884143		248.287	37.4092	265.967	4.07926	267.978	0.354081
z15	0.716861	0.0608389	0.938409	4.84541	0.331401	292.934		0.227126	0.051811	1.65588	0.301623	1.76928	0.0422222	0.170747	0.691005		277.076	37.9156	267.667	4.16299	266.593	0.445914
z16	0.651738	0.0458915	0.945232	5.39709	0.220682	329.429		0.206492	0.0512649	1.91369	0.298756	2.03564	0.0422664	0.199234	0.642616		252.758	44.0109	265.428	4.75467	266.866	0.520832
z17	0.560207	0.139634	0.953717	6.29531	0.562384	389.827		0.17748	0.0514959	1.10591	0.301755	1.19124	0.0424991	0.114669	0.765562		263.093	25.3863	267.77	2.80385	268.305	0.301347
208755 (634.4–634.6 m)
z1	0.618657	0.245142	0.986849	23.2716	0.271136	1371.87		0.195999	0.0514625	0.318376	0.301246	0.366106	0.042455	0.0849616	0.641278		261.598	7.31032	267.373	0.860594	268.032	0.223055
z2	0.531796	0.330927	0.990351	31.1259	0.267598	1869.8		0.16848	0.0515806	0.290371	0.302208	0.332277	0.0424931	0.0778375	0.621605		266.859	6.66093	268.123	0.782988	268.268	0.204528
z3	0.57299	0.254037	0.989262	28.2423	0.228846	1680.26		0.181532	0.0516254	0.31723	0.302273	0.360295	0.0424654	0.0781428	0.626694		268.854	7.27447	268.174	0.849153	268.097	0.205202
z4	0.507711	0.197503	0.987409	23.633	0.209022	1432.91		0.160853	0.05161	0.325442	0.302023	0.371799	0.0424428	0.0759735	0.674355		268.168	7.46369	267.979	0.875709	267.957	0.199403
z5	0.512862	0.139623	0.97802	13.4258	0.260427	820.841		0.162483	0.0514458	0.564258	0.301257	0.61934	0.0424704	0.085573	0.684153		260.858	12.9577	267.382	1.45591	268.127	0.224738
z6	0.533815	0.117925	0.974528	11.6051	0.255808	708.327		0.169123	0.0511684	0.727055	0.299335	0.789519	0.0424281	0.0984814	0.67153		248.423	16.7338	265.88	1.84684	267.866	0.258393
208794 (636.0–636.1 m)
z1	0.793527	1.39167	0.996931	105.264	0.355557	5878.9		0.251394	0.0515923	0.0932478	0.30205	0.148563	0.0424612	0.0637639	0.9212		267.381	2.13888	268	0.349938	268.071	0.167427
z2	0.847507	0.599966	0.99384	52.9767	0.308617	2929.03		0.268492	0.051648	0.166092	0.302451	0.21136	0.0424717	0.0663379	0.766826		269.859	3.80807	268.312	0.498363	268.135	0.174227
z3	0.597941	0.344628	0.988483	26.4857	0.333234	1566.63		0.189436	0.0518134	0.286138	0.303339	0.330462	0.0424604	0.0696213	0.699483		277.184	6.55167	269.005	0.780947	268.066	0.182804
z4	0.6225	0.143952	0.965262	8.62971	0.42995	519.386		0.197203	0.05197	0.854741	0.305626	0.923745	0.0426517	0.108108	0.672969		284.089	19.5467	270.785	2.1956	269.249	0.285083
z5	0.52394	0.206181	0.980861	15.5113	0.333896	942.681		0.165995	0.0516624	0.457158	0.302273	0.508429	0.0424349	0.0790082	0.693958		270.496	10.4801	268.174	1.19828	267.908	0.207331
z6	0.672724	0.112018	0.969709	10.066	0.290407	595.628		0.213125	0.0514957	0.711335	0.301578	0.77449	0.0424744	0.0970693	0.686846		263.082	16.3288	267.632	1.82211	268.152	0.254954
Notes
(a) z1, z2, etc. are labels for analyses composed of single zircon grains that were annealed and chemically abraded (Mattinson, 2005). Labels in bold denote analyses used in weighted mean calculations.
(b) Model Th/U ratio calculated from radiogenic 208Pb/206Pb ratio and 207Pb/235U date.
(c) Pb* and Pbc are radiogenic and common Pb, respectively. mol % 206Pb* is with respect to radiogenic and blank Pb.
(d) Measured ratio corrected for spike and fractionation only. Fractionation correction is 0.16 ± 0.03 (1 sigma) %/amu (atomic mass unit) for single-collector Daly analyses,
based on analysis of EARTHTIME 202Pb-205Pb tracer solution.
(e) Corrected for fractionation and spike. Common Pb in zircon analyses is assigned to procedural blank with composition of 206Pb/204Pb = 18.04 ± 0.61%; 207Pb/204Pb = 15.54 ± 0.52%; 208Pb/204Pb = 37.69 ± 0.63% (1 sigma).
206Pb/238U and 207Pb/206Pb ratios corrected for initial disequilibrium in 230Th/238U using Th/U [magma] = 3.0 ± 0.3 (1 sigma).
(f) Errors are 2 sigma, propagated using algorithms of Schmitz and Schoene (2007) and Crowley et al. (2007).
(g) Calculations based on the decay constants of Jaffey et al. (1971). 206Pb/238U and 207Pb/206Pb dates corrected for initial disequilibrium in 230Th/238U using Th/U [magma] = 3.0 ± 0.3 (1 sigma).

## Sheet: Table A4
Mory, Crowley, Backhouse, Nicholl, Bryan, Lopez Martinez & Mantle (2017). Australian Journal of Earth Sciences, 64(7), doi:10.1080/08120099.2017.1365586
Table A4. Ar–Ar data for sample 711.85–711.95 m from Pittston SD-1
Pwr	39Ar x 10-6	%39Ar	40Ar*/39ArK	1s	Age in Ma	1s		% 40Ar*	40Ar/36Ar	37ArCa/39ArK
Laser step-heating experiments with plagioclase concentrate
1	5.898	15.72	41.09	3.7	187.43	16.03	a‡	21.38	375.85	12.84
2	9.174	24.34	54.44	0.99	244.33	4.15	b	78.95	1403.64	19.87
3	6.39	16.97	52.19	1.18	234.86	4.96	c	94.33	5211.55	18.43
4	3.558	9.47	50.24	1.82	226.62	7.71	d	93.88	4824.58	15.02
5.5	3.696	9.83	52.39	1.99	235.72	8.4	e	87.85	2432.87	15.44
8	4.335	11.47	52.97	1.99	238.16	8.38	f	85.96	2105.09	23.95
10	4.694	12.21	71.51	2.03	314.61	8.2	g‡	76.34	1249.2	50.53
Integrated results
	37.22		53.28	0.83	239.45	3.55		62.09	779.38	21.84
Laser step-heating experiments with groundmass sample
0.5	1.865	5.87	63.66	6.24	281.29	25.54	h	20.02	369.48	14.81
1.2	6.367	19.91	49.37	1.66	221.88	7.02	i	75.47	1204.53	24.96
1.8	7.416	23.16	50.8	1.06	227.9	4.48	j	93.73	4712.58	26.59
2.4	4.427	13.86	47.85	1.48	215.45	6.26	k	95.42	6453.34	23.42
3	3.653	11.45	49.9	1.75	224.11	7.38	l	99.52	61276.8	21.46
4.5	3.75	11.65	51.62	1.63	231.36	6.86	m	99.99	2.01474e+06	35.26
6	4.982	14.11	46.97	1.78	211.68	7.58	n‡	92.35	3861.83	187.47
Integrated results
	31.47		50.31	0.73	225.85	3.16		71.76	1046.38	48.26
Notes
J = 0.002651 ± 0.000008 (J is a measure of reproducibility determined from split gas fractions of selected monitor samples)
Preferred age tp = 224.79 ± 2.79 Ma groundmass; Weighted mean of fractions i to m, representing 80.03% of 39Ar released in 5 consecutive fractions, MSWD = 0.95
Isochron with groundmass results: tc = 224.19 ± 2.95 Ma; (40Ar/36Ar)i = 311 ± 8, MSWD = 1.2 for n = 6
For the plagioclase: tp = 232.94 ± 3.47 Ma; Weighted mean of fractions c to f, representing 47.74% of 39Ar released in 4 consecutive fractions, MSWD = 0.41
Isochron with plagioclase results: tc = 227.57 ± 6.01 Ma; (40Ar/36Ar)i = 372 ± 42, MSWD = 0.2 for n = 5
* total radiogenic plus atmospheric 40Ar
‡ fractions ignored to calculate the isochron ages
